# Supplementary material for: CD40 induces macrophage anti–Toxoplasma gondii activity by triggering autophagy-dependent fusion of pathogen-containing vacuoles and lysosomes
Source: JCI journal article supplement (doi:10.1172/jci28796), 2006-09-01

**CD40 INDUCES MACROPHAGE ANTI-*TOXOPLASMA GONDII* ACTIVITY  
BY TRIGGERING AUTOPHAGY-DEPENDENT FUSION OF  
PATHOGEN-CONTAINING VACUOLES AND LYSOSOMES**

Rosa M. Andrade, Matthew Wessendarp, Marc-Jan Gubbels, Boris Striepen, and Carlos S. Subauste

Figure S1. A subset of macrophages exhibits vacuole-lysosome fusion in response to CD40 stimulation. Monolayers of mouse resident peritoneal macrophages were incubated with a stimulatory anti-CD40 or control mAbs. Macrophages were infected with *T. gondii*-YFP followed by staining with biotinylated anti-CD40 mAb plus Alexa 643-conjugated streptavidin, and anti-LAMP-1 plus Texas Red-conjugated secondary Abs. Cells were examined by confocal microscopy 8 h post-infection. CD40<sup>+</sup> macrophages activated through this receptor show colocalization of LAMP-1 (rings) around *T. gondii*-containing vacuoles (arrows). Bar = 5  $\mu$ m. Results shown are representative of three independent experiments.

Figure S2. Vacuole-lysosome fusion mediates macrophage anti-microbial activity induced by CD40. Mouse peritoneal macrophages were incubated with control or anti-CD40 mAb or with IFN- $\gamma$ /LPS followed by infection with *T. gondii*. *A, B*, Leupeptin (2 mg/ml) was added 1 h after infection. Percentage of infected macrophages and parasite load were assessed by light microscopy at 1 and 18 h post-challenge. *C- E*, LY294002 (20 nM) was added 1 h after infection with *T. gondii*. *C*, expression of cathepsin D was examined by immunofluorescence 8 h post-infection. *D, E*, percentage of infected

macrophages and parasite load were assessed at 1 and 18 h post-challenge. Results are shown as the mean  $\pm$  SD and are representative of 3 to 4 independent experiments.

Figure S3. Autophagy induces vacuole-lysosome fusion and anti-microbial activity.

*A*, Colocalization of LC3 around PV in RAW 264.7 cells treated with rapamycin. RAW 264.7 cells were transfected with LC3-EGFP followed by infection with *T. gondii*-RFP. Cells were treated with vehicle or rapamycin (1  $\mu$ M) beginning 2 h after infection. Percentages of vacuoles that colocalized with LC3 were assessed by immunofluorescence 3 h after adding rapamycin. *B*, RAW 264.7 cells transfected with control or Beclin 1 siRNA were infected with *T. gondii* followed by treatment with or without rapamycin. Parasite load was assessed by light microscopy 18 h post-infection. *C*, Mouse resident peritoneal macrophages were infected with *T. gondii* followed by incubation in medium with or without rapamycin and/or 3-MA (10 mM). Parasite load was assessed at 18 h post-infection. Results are shown as the mean  $\pm$  SD and are representative of 3 independent experiments.

**Figure S1**

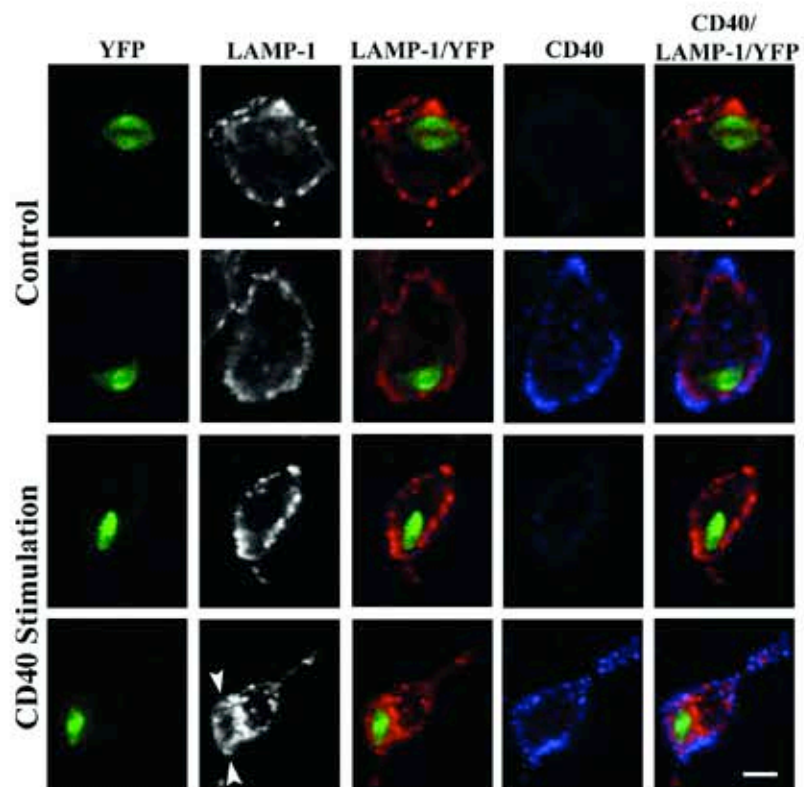

Figure S2

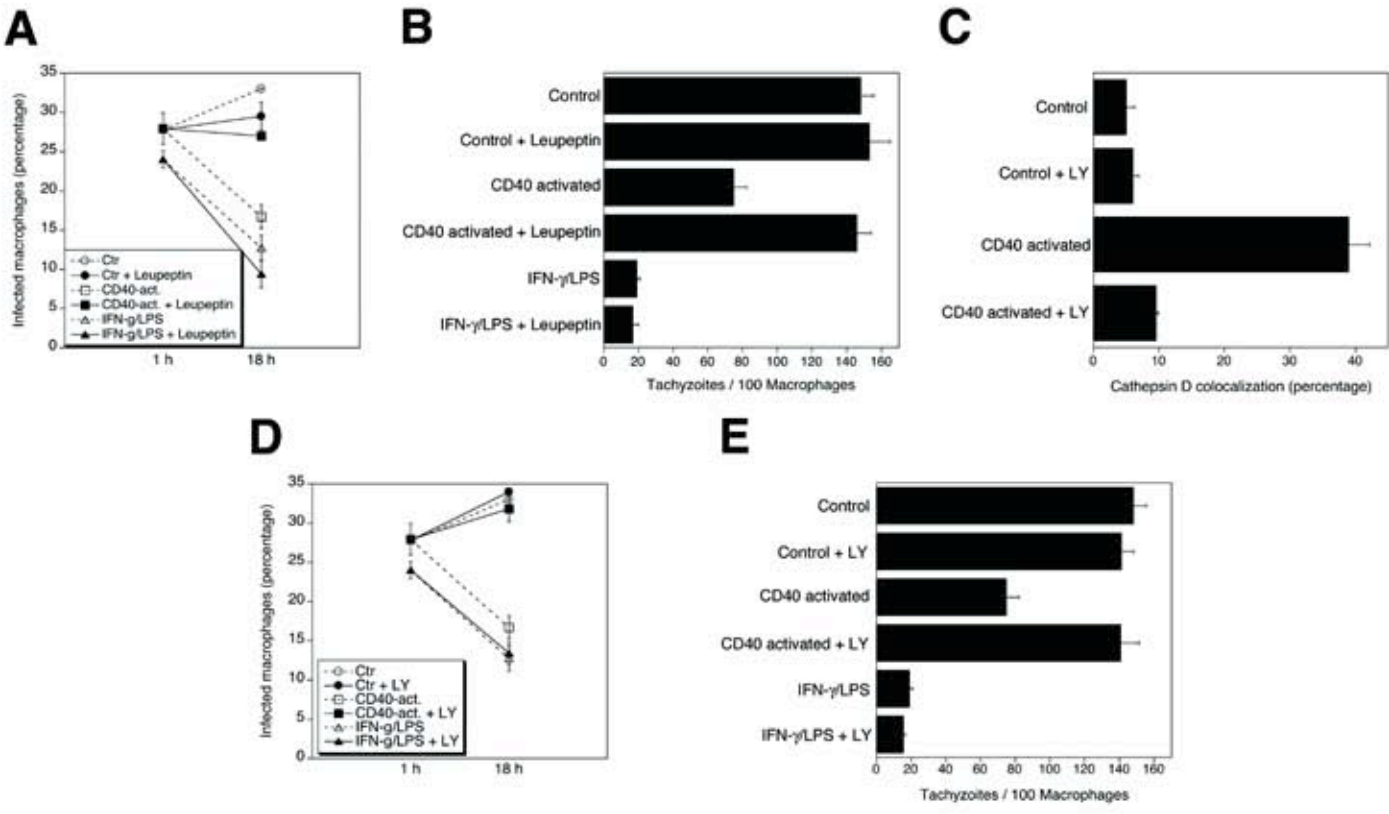

**Figure S3**

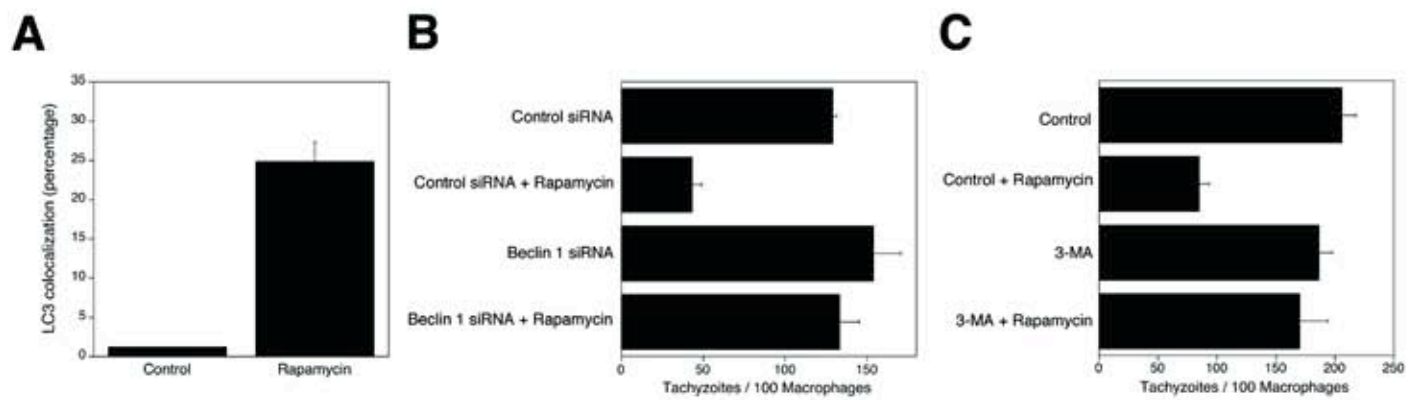

Supplement: sd1 [file 1]
